# Supplementary material
Source: PubMed Central journal article supplement (PMC2638749)
Supplement: dkn387_1.pdf [file dkn387_1.pdf]

## Supplementary data

**Table S1:** Genes involved in DNA repair, mutagenesis and recombination in *M. tuberculosis* which were further studied in this experiment. This list was compiled from Mizrahi and Andersen,<sup>18</sup> and a search of the Entrez Genome, NCBI database of the COG (clusters of orthologous groups of proteins) classification DNA replication, recombination and repair.

| Gene              | Ref   | Gene        | Ref   | Gene        | Ref   |
|-------------------|-------|-------------|-------|-------------|-------|
| <i>ada, alkA</i>  | M & A | <i>recR</i> | M & A | Rv2817c     | NCBI  |
| <i>arcA</i>       | NCBI  | <i>rpoB</i> | NCBI  | Rv2819c     | NCBI  |
| <i>dinG</i>       | M & A | <i>rpsF</i> | NCBI  | Rv2820c     | NCBI  |
| <i>dinP, dinB</i> | M & A | <i>ruvA</i> | M & A | Rv2821c     | NCBI  |
| <i>dinX</i>       | NCBI  | <i>ruvB</i> | M & A | Rv2884      | NCBI  |
| <i>dnaB</i>       | NCBI  | <i>ruvC</i> | M & A | Rv2896c     | NCBI  |
| <i>dnaE1</i>      | NCBI  | Rv0586      | NCBI  | Rv2943      | NCBI  |
| <i>dnaE2</i>      | NCBI  | Rv0741      | NCBI  | Rv2944      | NCBI  |
| <i>dut</i>        | M & A | Rv0938      | NCBI  | Rv2978c     | NCBI  |
| <i>embB</i>       | NCBI  | Rv1035c     | NCBI  | Rv3040c     | NCBI  |
| <i>fpg, mutM</i>  | M & A | Rv1036c     | NCBI  | Rv3185      | NCBI  |
| <i>gnd</i>        | NCBI  | Rv1055      | NCBI  | Rv3198c     | NCBI  |
| <i>gyrA</i>       | M & A | Rv1227c     | NCBI  | Rv3201c     | NCBI  |
| <i>gyrB</i>       | M & A | Rv1688      | NCBI  | Rv3202c     | NCBI  |
| <i>lexA</i>       | M & A | Rv1956      | NCBI  | Rv3380c     | NCBI  |
| <i>ligA</i>       | M & A | Rv1985c     | NCBI  | Rv3386      | NCBI  |
| <i>linB</i>       | NCBI  | Rv2013      | NCBI  | Rv3394c     | NCBI  |
| <i>mfd</i>        | M & A | Rv2017      | NCBI  | Rv3428c     | NCBI  |
| <i>mpg</i>        | M & A | Rv2090      | NCBI  | Rv3430c     | NCBI  |
| <i>mutT</i>       | M & A | Rv2100      | NCBI  | Rv3672c     | NCBI  |
| <i>mutT1</i>      | NCBI  | Rv2105      | NCBI  | Rv3856c     | NCBI  |
| <i>mutT3</i>      | NCBI  | Rv2106      | NCBI  | Rv3908      | NCBI  |
| <i>mutY</i>       | M & A | Rv2119      | NCBI  | <i>sigE</i> | NCBI  |
| <i>nei</i>        | M & A | Rv2167c     | NCBI  | <i>sigG</i> | NCBI  |
| <i>nfo, end</i>   | M & A | Rv2177c     | NCBI  | <i>sigH</i> | NCBI  |
| <i>nth</i>        | M & A | Rv2191      | NCBI  | <i>ssb</i>  | M & A |
| <i>ogt</i>        | M & A | Rv2278      | NCBI  | <i>tagA</i> | M & A |
| <i>polA</i>       | M & A | Rv2362c     | NCBI  | <i>topA</i> | M & A |
| <i>polC</i>       | M & A | Rv2464c     | NCBI  | <i>ung</i>  | M & A |
| <i>radA</i>       | M & A | Rv2479c     | NCBI  | <i>uvrA</i> | M & A |
| <i>recA</i>       | M & A | Rv2512c     | NCBI  | <i>uvrB</i> | M & A |
| <i>recB</i>       | M & A | Rv2578c     | NCBI  | <i>uvrC</i> | M & A |
| <i>recC</i>       | M & A | Rv2609c     | NCBI  | <i>uvrD</i> | M & A |
| <i>recD</i>       | M & A | Rv2648      | NCBI  | <i>xthA</i> | M & A |
| <i>recF</i>       | M & A | Rv2719c     | NCBI  | <i>yshC</i> | M & A |
| <i>recG</i>       | M & A | Rv2791c     | NCBI  |             |       |
| <i>recN</i>       | M & A | Rv2816c     | NCBI  |             |       |
